# Supplementary material for: The Synthesis of Different Series of Cobalt BEA Zeolite Catalysts by Post-Synthesis Methods and Their Characterization
Source: MDPI journal article supplement (doi:10.3390/catal12121644), 2022-12-15
Supplement: s1 [file s1]

# **The oxidative dehydrogenation of propane on series of cobalt BEA zeolite catalysts prepared by post-synthesis methods, Part I: Catalyst synthesis and characterization**

Renata Sadek<sup>1,2</sup>, Karolina Chalupka-Spiewak<sup>1</sup>, Jean-Marc Krafft<sup>2</sup>, Yannick Millot<sup>2</sup>, Laetitia Valentin<sup>2</sup>, Sandra Casale<sup>2</sup>, Jacek Gurgul<sup>3</sup>, Stanislaw Dzwigaj<sup>2,\*</sup>

<sup>1</sup>Lodz University of Technology, Institute of General and Ecological Chemistry, Zeromskiego 116, 90 – 924 Lodz, Poland

<sup>2</sup>Laboratoire de Réactivité de Surface, Sorbonne Université-CNRS, UMR 7197, 4 Place Jussieu, Case 178, F-75252, Paris, France

<sup>3</sup>Jerzy Haber Institute of Catalysis and Surface Chemistry, Polish Academy of Sciences, Niezapominajek 8, PL-30239 Kraków, Poland

Figures: 6

Tables: 1

**Keywords:** BEA, zeolite, cobalt, DR UV-vis, NMR, XPS

\*Corresponding author:

Prof. Stanislaw Dzwigaj, E-mail:stanislaw.dzwigaj@upmc.fr, tel: 33 1 44 27 21 13

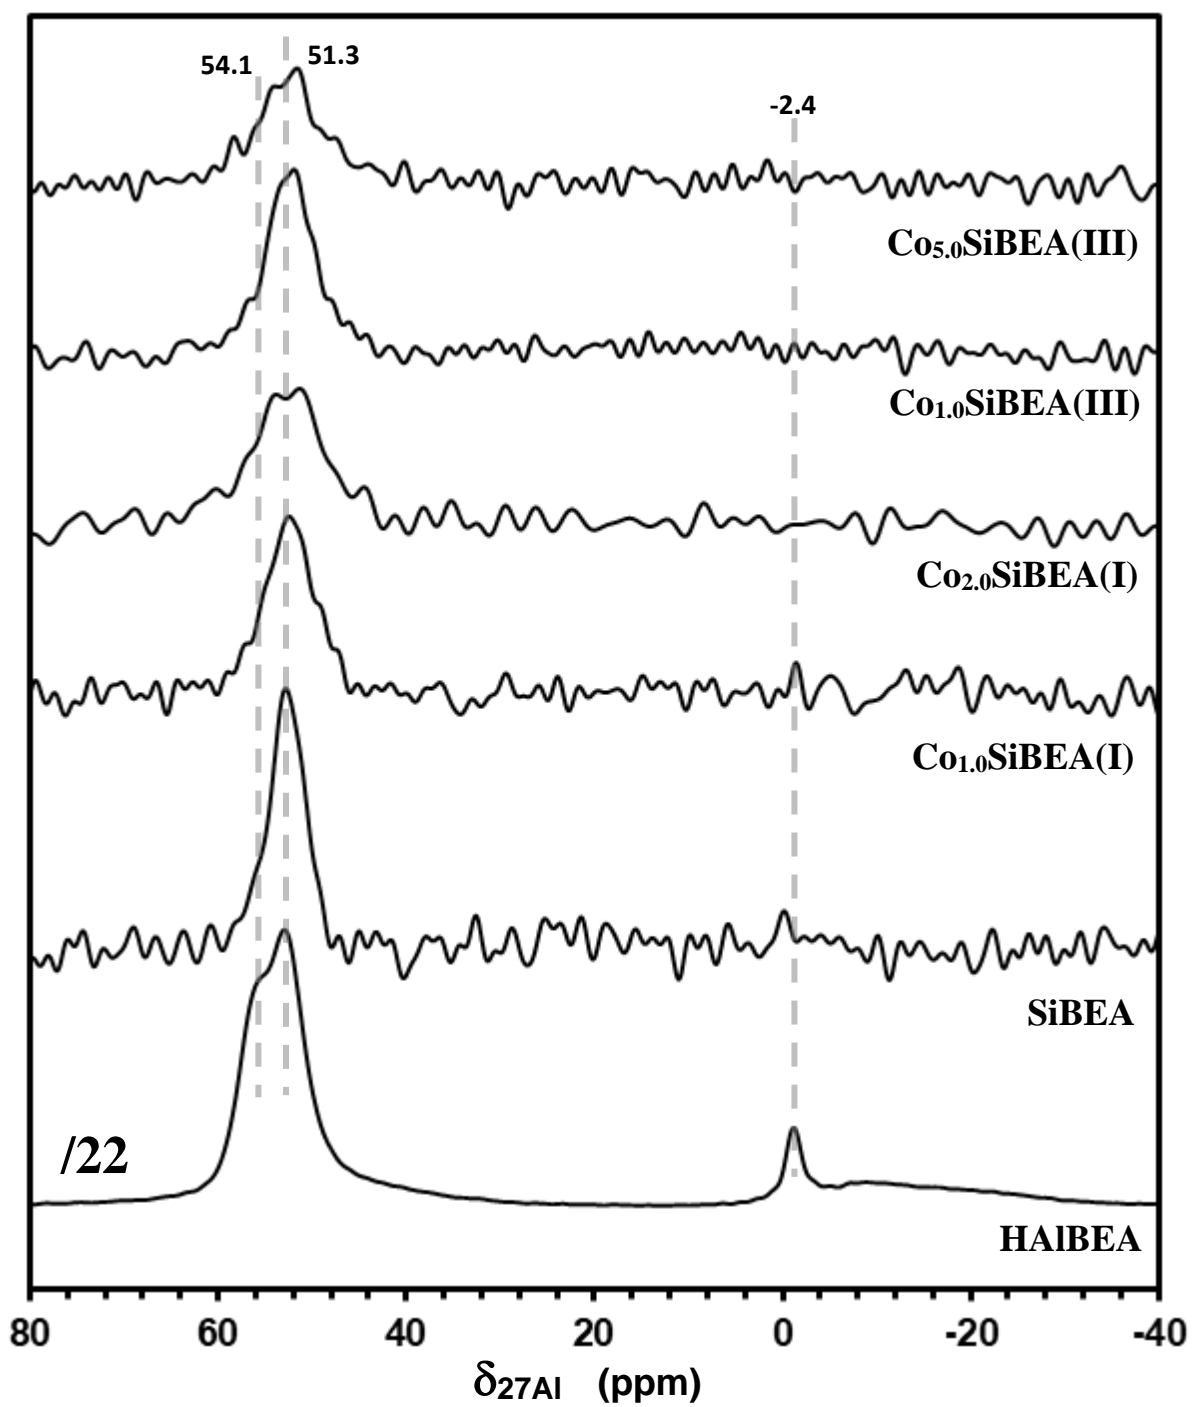

**Figure S1.**  $^{27}\text{Al}$  MAS NMR of HAIBEA, SiBEA,  $\text{Co}_{1.0}\text{SiBEA(I)}$ ,  $\text{Co}_{2.0}\text{SiBEA(I)}$ ,  $\text{Co}_{1.0}\text{SiBEA(III)}$  and  $\text{Co}_{5.0}\text{SiBEA(III)}$ .

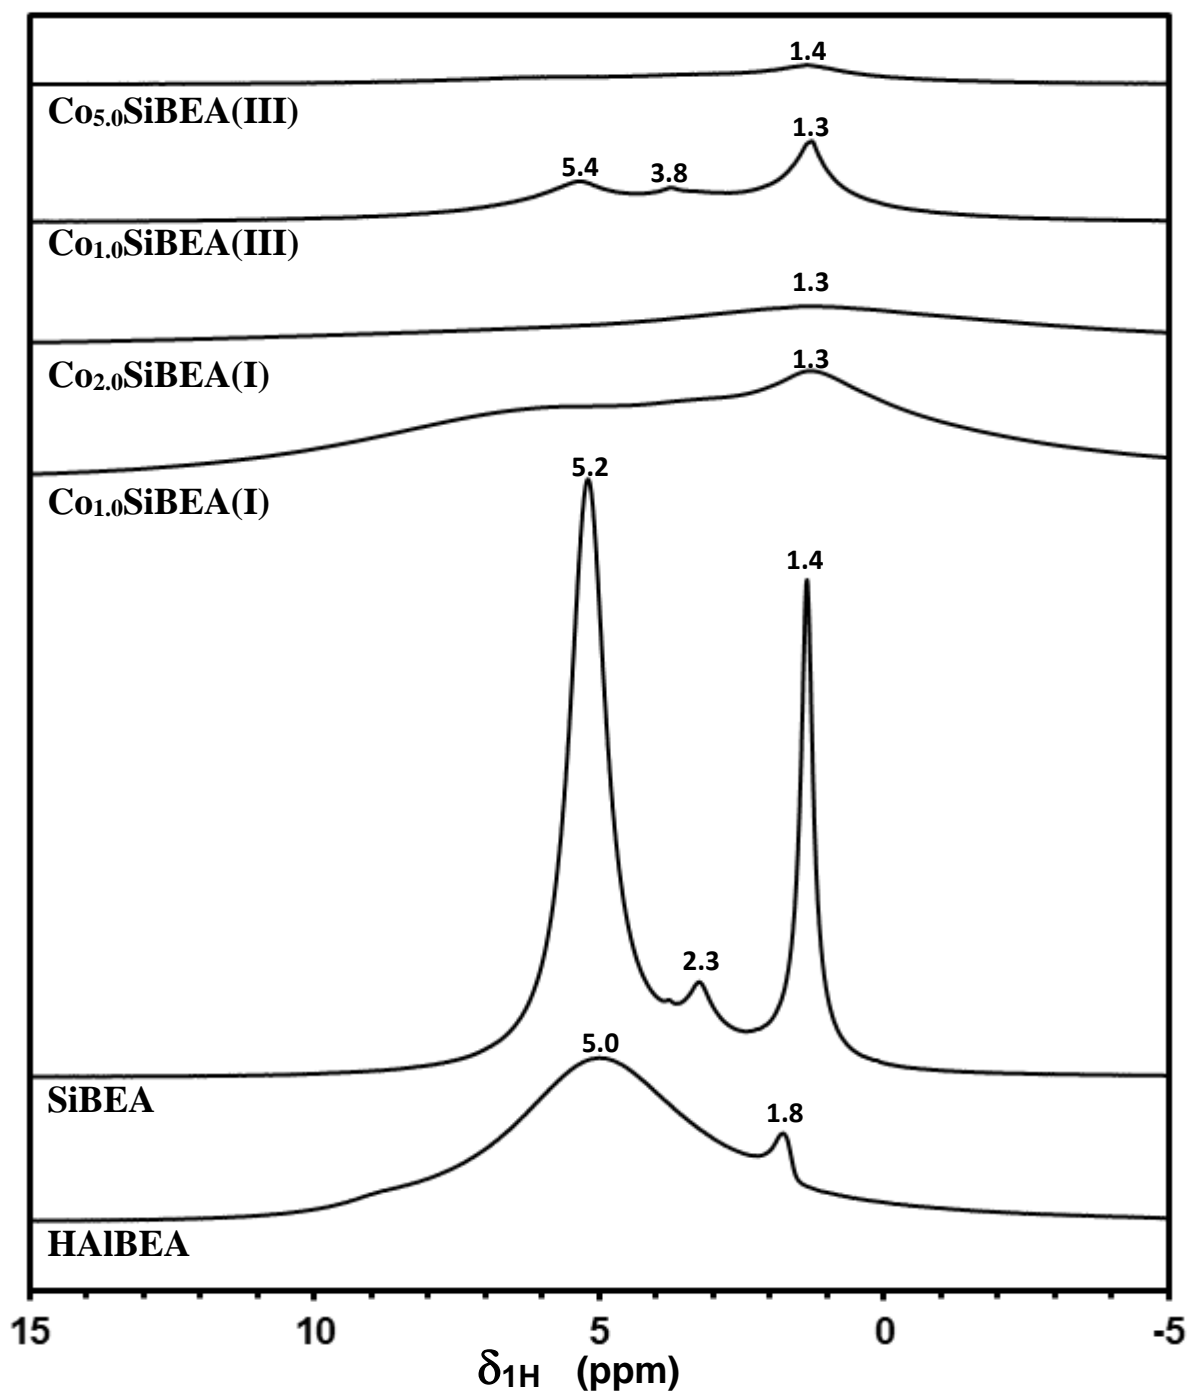

**Figure S2.**  $^1\text{H}$  MAS NMR of HAIBEA, SiBEA,  $\text{Co}_{1.0}\text{SiBEA(I)}$ ,  $\text{Co}_{2.0}\text{SiBEA(I)}$ ,  $\text{Co}_{1.0}\text{SiBEA(III)}$  and  $\text{Co}_{5.0}\text{SiBEA(III)}$ .

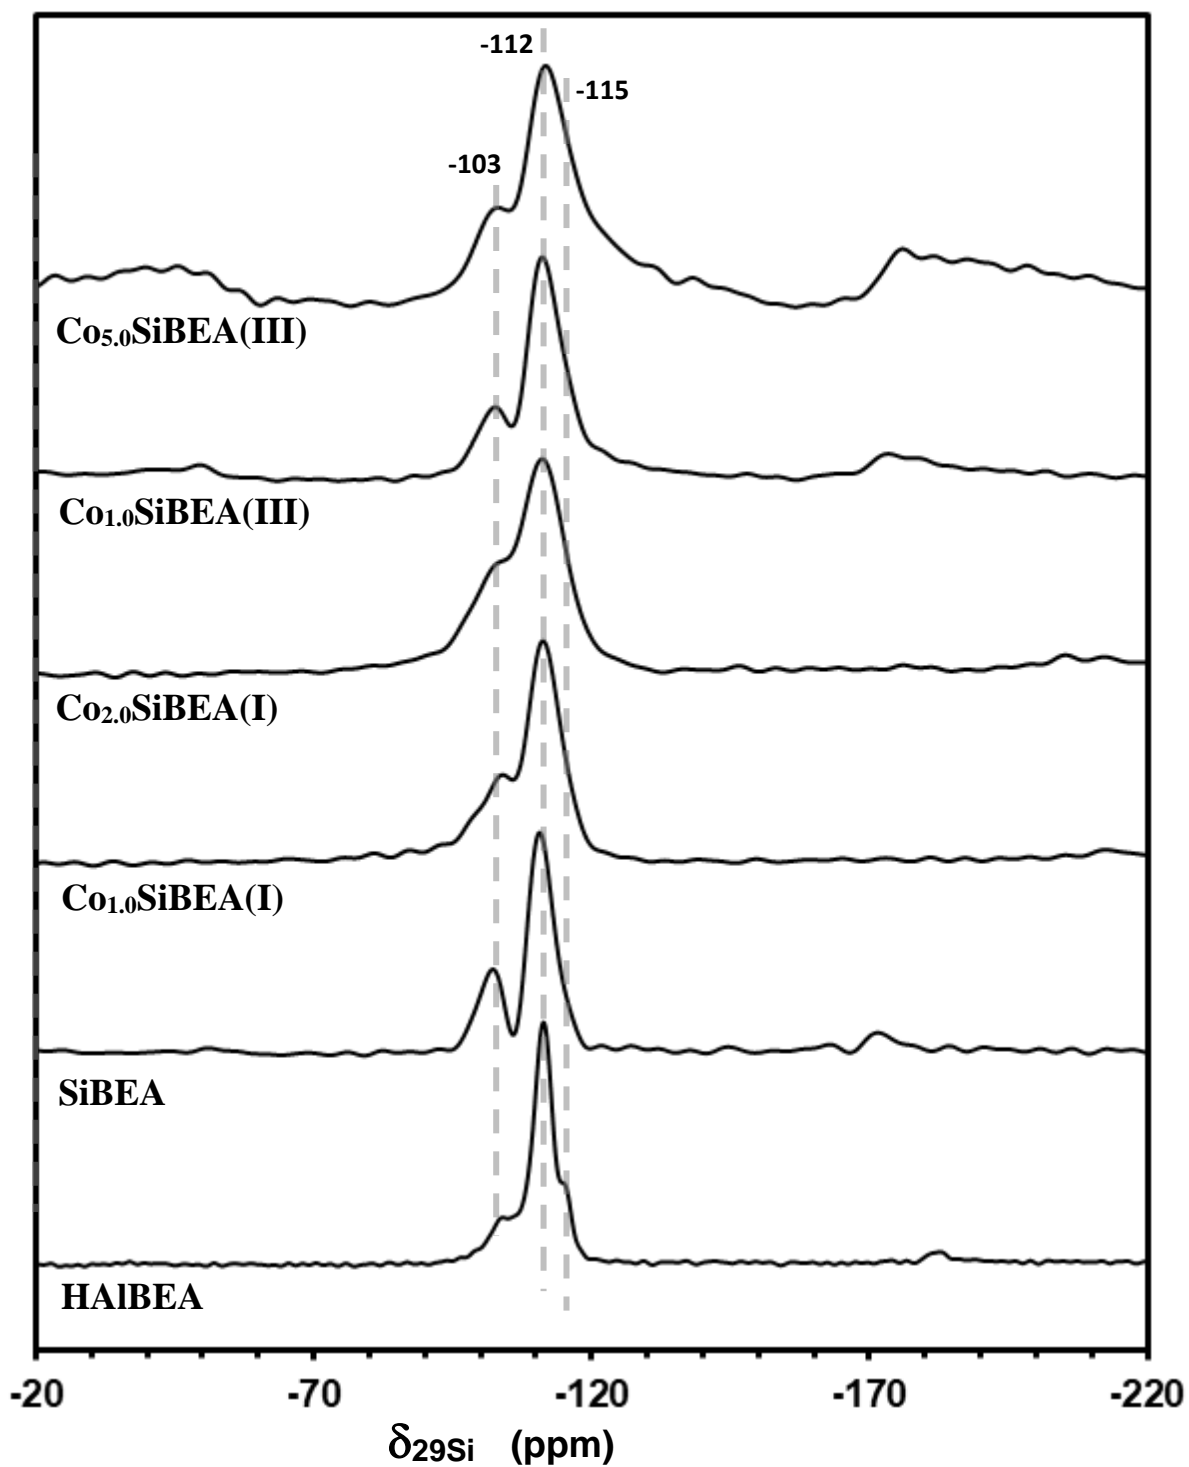

**Figure S3.**  $^{29}\text{Si}$  MAS NMR of HAIBEa, SiBEA,  $\text{Co}_{1.0}\text{SiBEA(I)}$ ,  $\text{Co}_{2.0}\text{SiBEA(I)}$ ,  $\text{Co}_{1.0}\text{SiBEA(III)}$  and  $\text{Co}_{5.0}\text{SiBEA(III)}$ .

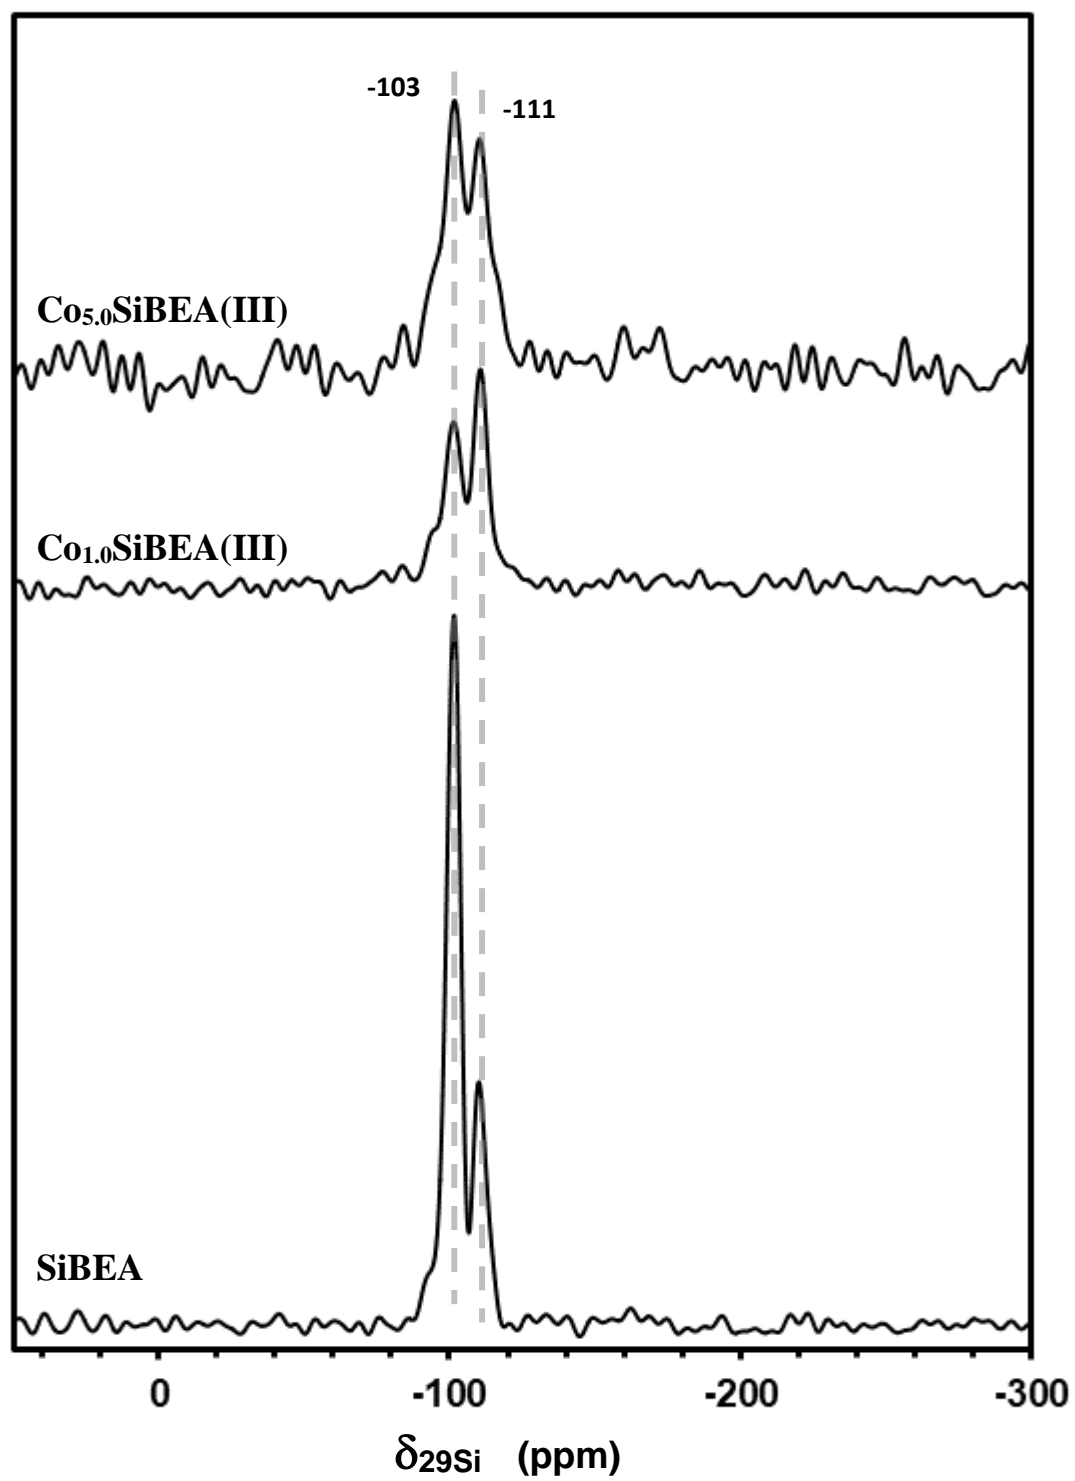

**Figure S4.**  $^1\text{H}$  -  $^{29}\text{Si}$  CP MAS NMR of SiBEA, Co<sub>1.0</sub>SiBEA(III) and Co<sub>5.0</sub>SiBEA(III).

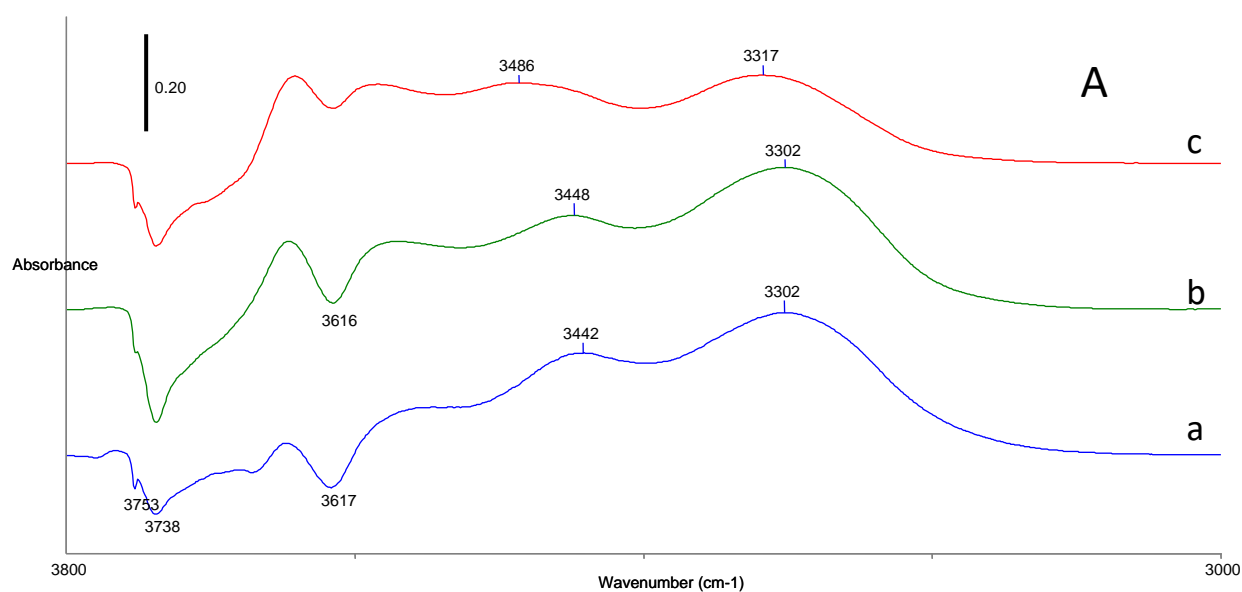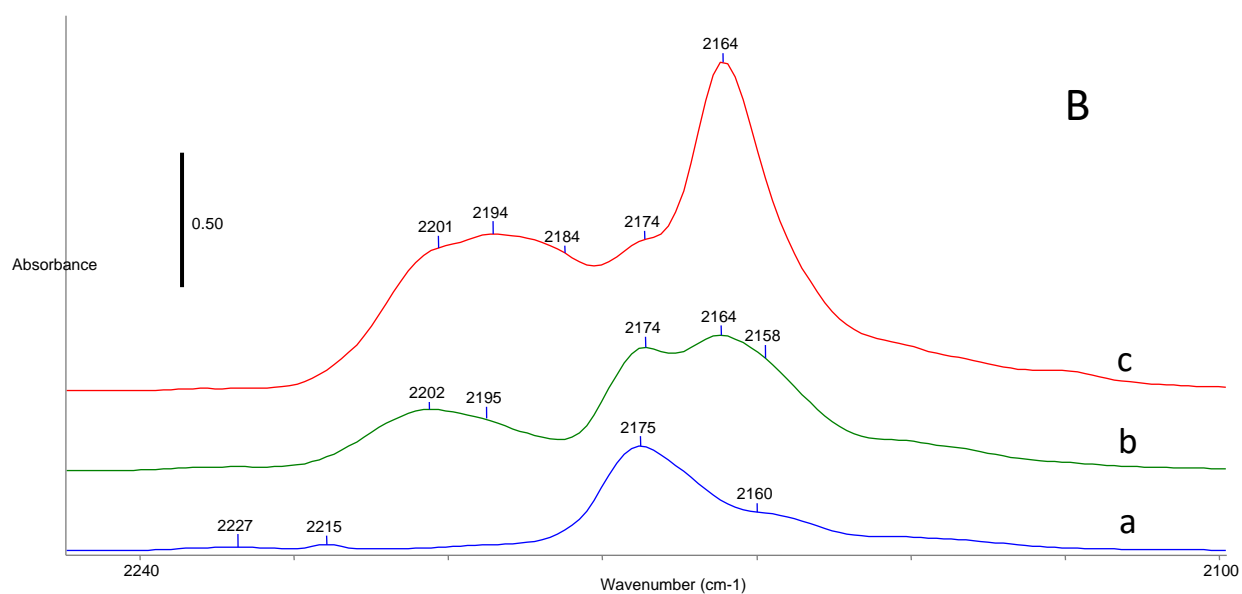

**Figure S5.** FTIR difference spectra in hydroxyl (A) and carbonyl (B) stretching range of HAIBEA (a), Co<sub>1.0</sub>HAIBEA(II) (b) and Co<sub>5.0</sub>HAIBEA(II) (c) after CO adsorption at 173°C with equilibrium pressure 133 Pa of CO and secondary vacuum evacuation for 5 minutes (pressure < 5×10<sup>-2</sup> Pa)

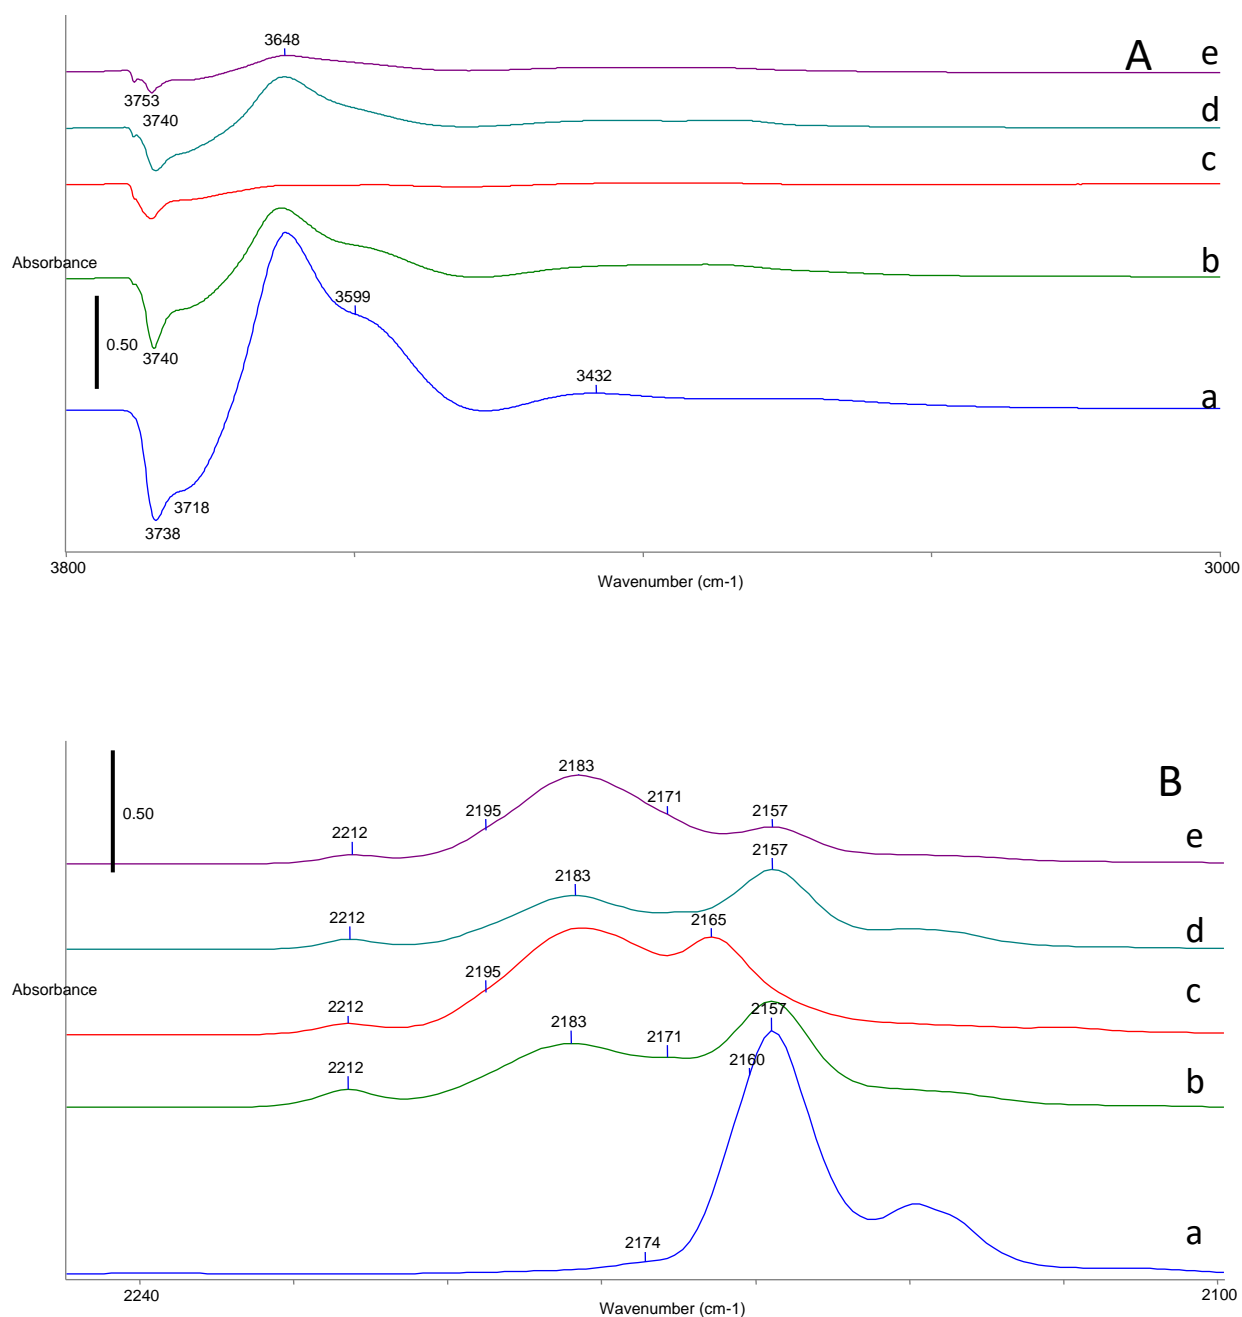

**Figure S6.** FTIR difference spectra in hydroxyl (A) and carbonyl (B) stretching range of SiBEA (a), Co<sub>1.0</sub>SiBEA(I) (b), Co<sub>5.0</sub>SiBEA(I) (c), Co<sub>1.0</sub>SiBEA(III) (d) and Co<sub>5.0</sub>SiBEA(III) (e) after CO adsorption at 173°C with equilibrium pressure 133 Pa of CO and secondary vacuum evacuation for 5 minutes (pressure < 5×10<sup>-2</sup> Pa)

**Table S1. XPS O 1s data of catalysts with pH = 2.5 (upper part) and pH = 3.0-9.0 (lower part)**

| Sample                          | A       |          | B       |          | C       |          |
|---------------------------------|---------|----------|---------|----------|---------|----------|
|                                 | BE (eV) | Area (%) | BE (eV) | Area (%) | BE (eV) | Area (%) |
| AP-Co <sub>3.0</sub> SiBEA(I)   | 531.4   | 3.6      | 533.5   | 87.1     | 534.4   | 9.3      |
| AP-Co <sub>5.0</sub> SiBEA(I)   | 531.3   | 4.4      | 533.2   | 90.1     | 534.8   | 5.5      |
| AP-Co <sub>9.0</sub> SiBEA(I)   | 531.6   | 8.7      | 533.3   | 86.8     | 534.7   | 4.5      |
| Co <sub>9.0</sub> SiBEA(I)      | 531.4   | 7.1      | 533.6   | 88.5     | 534.7   | 4.4      |
| AP-Co <sub>1.0</sub> SiBEA(III) | 531.3   | 2.7      | 533.7   | 94.2     | 535.7   | 3.1      |
| AP-Co <sub>3.0</sub> SiBEA(III) | 531.8   | 8.1      | 533.5   | 87.7     | 535.1   | 4.2      |
| AP-Co <sub>5.0</sub> SiBEA(III) | 531.4   | 7.8      | 533.4   | 89.6     | 535.4   | 2.6      |
| Co <sub>5.0</sub> SiBEA(III)    | 531.4   | 4.5      | 533.8   | 89.9     | 535.1   | 5.6      |
| Co <sub>9.0</sub> SiBEA(III)    | 531.3   | 5.4      | 533.8   | 91.0     | 535.6   | 3.6      |
